# Supplementary material for: Prevalence of germline TP53 variants among early-onset breast cancer patients from Polish population
Source: PubMed Central journal article supplement (PMC7796867; doi:10.1007/s12282-020-01151-7), 2020-09-04
Supplement: 12282_2020_1151_MOESM1_ESM.pdf [file 12282_2020_1151_MOESM1_ESM.pdf]

| TP53     | Primer pairs                                             | Ta*              | Amplicon size (bp) |
|----------|----------------------------------------------------------|------------------|--------------------|
| exon 2-3 | F: GTTGGAAAGTGTCTCATGCTGGA / R: TAGATGGGTGAAAAGAGCAGTCAG | 60.55 /<br>60.32 | 390                |
| exon 3-4 | F: GAGACCTGTGGGAAGCGAAAAT / R: CAACTTTGGGACAGGAGTCAGA    | 60.88 /<br>59.90 | 637                |
| exon 5-6 | F: CTCTCTAGCTCGCTAGTGGGTT / R: ATGGGGTTATAGGGAGGTCAAAT   | 61.01 /<br>58.68 | 624                |
| exon 7   | F: ACAGGTCTCCCAAGG / R: AACTGAGTGGGAGCAGTAAGGAGA         | 53.92 /<br>63.23 | 325                |
| exon 8-9 | F: CTCTCATCACATCCCCGGC / R: CAAATGCCCAATTGCAGGTAA        | 59.93 /<br>60.03 | 634                |
| exon 10  | F: GTCAGCTGTATAGGTA CTTGAAGT / R: CAGCTGCCTTTGACCATGAAG  | 57.79 /<br>59.80 | 356                |
| exon 11  | F: GTGGCCACCATCTTGATTTGAAT / R: GCAAGCAAGGGTTCAAAGACC    | 59.80 /<br>60.27 | 307                |

\*Ta = Annealing temperature (°C)
